# Supplementary material for: A Novel Strategy for Topical Administration by Combining Chitosan Hydrogel Beads with Nanostructured Lipid Carriers: Preparation, Characterization, and Evaluation
Source: MDPI journal article supplement (doi:10.3390/gels10030160), 2024-02-21
Supplement: s1 [file s1]

## Supplementary materials

### Long-term stability study

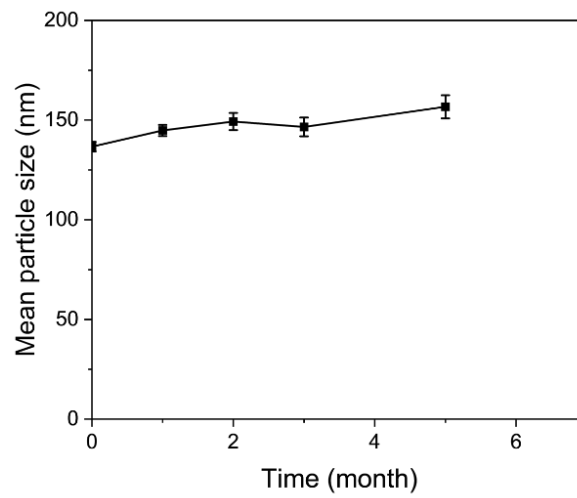

**Figure S1.** Mean particle size of NLC released from chitosan hydrogel beads (3% (w/v) of chitosan) after 5 months of storage at room temperature.

## Void fraction

The blank chitosan hydrogel beads and NLC-chitosan hydrogel beads were dehydrated by the freeze-drying method, and the weight of the dried beads was measured. Then, the void fraction of beads was computed by the following equation:

$$\text{void fraction (\%)} = \frac{V - (M/\rho)}{V} \times 100\%$$

where V is the volume of beads, M is the weight of dried beads,  $\rho$  is the density of the mixture of NLC and chitosan.

**Table S1.** The void fraction of blank chitosan hydrogel beads and NLC-chitosan hydrogel beads

|                               | Void fraction (%) |
|-------------------------------|-------------------|
| Blank chitosan hydrogel beads | 98.89±0.07        |
| NLC-chitosan hydrogel beads   | 95.76±0.19        |

## Values of flux

**Table S2.** Values of flux of quercetin from NLC and NLC-chitosan hydrogel

|                       | Flux ( $\mu\text{g}/\text{cm}^2/\text{h}$ ) |
|-----------------------|---------------------------------------------|
| NLC                   | 1.400 $\pm$ 0.024                           |
| NLC-chitosan hydrogel | 2.078 $\pm$ 0.106                           |

By performing linear regression on the straight portion (6-12 h) of the time-concentration curve for accumulation permeation of quercetin, the slope of the line could be determined as the flux.

Original data of Figure 2C

| Chitosan concentration | Mean particle size of NLC in chitosan sol (nm) | Mean particle size of NLC released from chitosan hydrogel beads (nm) |
|------------------------|------------------------------------------------|----------------------------------------------------------------------|
| 1.5%                   | 204.7±9.8                                      | 138.4±2.2                                                            |
| 2%                     | 223.2±7.1                                      | 134.7±2.9                                                            |
| 2.5%                   | 259.1±8.9                                      | 136.1±2.5                                                            |
| 3%                     | 288.6±11.4                                     | 136.7±1.4                                                            |

Original data of Figure 7A

|                                    | Retention rate after 5 month (%) | Retention rate after 10 month (%) |
|------------------------------------|----------------------------------|-----------------------------------|
| NLC                                | 78.33±2.81                       | 63.24±4.32                        |
| NLC-chitosan hydrogel beads (1.5%) | 85.12±3.18                       | 75.77±3.14                        |
| NLC-chitosan hydrogel beads (2%)   | 88.86±2.63                       | 79.83±3.09                        |
| NLC-chitosan hydrogel beads (2.5%) | 93.43±1.76                       | 86.48±1.83                        |
| NLC-chitosan hydrogel beads (3%)   | 92.32±1.47                       | 88.63±2.57                        |

Original data of Figure 8A

|                                    | Permeation (µg/cm <sup>2</sup> ) | Retention (µg/cm <sup>2</sup> ) |
|------------------------------------|----------------------------------|---------------------------------|
| Free quercetin                     | 2.23±0.64                        | 3.87±1.46                       |
| NLC                                | 12.45±1.35                       | 7.38±1.23                       |
| NLC-chitosan hydrogel beads (1.5%) | 13.73±1.81                       | 9.27±0.45                       |
| NLC-chitosan hydrogel beads (2%)   | 16.28±1.57                       | 11.22±0.84                      |
| NLC-chitosan hydrogel beads (2.5%) | 19.04±1.69                       | 11.90±0.78                      |
| NLC-chitosan hydrogel beads (3%)   | 17.73±1.88                       | 11.62±1.31                      |

Original data of Figure 8B

| Time | Permeation (NLC) (µg/cm <sup>2</sup> ) | Permeation (NLC-chitosan hydrogel) (µg/cm <sup>2</sup> ) | Retention (NLC) (µg/cm <sup>2</sup> ) | Retention (NLC-chitosan hydrogel) (µg/cm <sup>2</sup> ) |
|------|----------------------------------------|----------------------------------------------------------|---------------------------------------|---------------------------------------------------------|
| 3 h  | 2.16±0.68                              | 1.82±0.90                                                | 5.93±1.06                             | 5.13±0.62                                               |
| 6 h  | 4.08±0.72                              | 6.45±1.11                                                | 6.08±0.98                             | 6.28±0.75                                               |
| 9 h  | 8.13±1.55                              | 12.08±1.82                                               | 6.74±1.11                             | 9.44±1.13                                               |
| 12 h | 12.52±1.35                             | 19.04±1.69                                               | 7.43±1.23                             | 11.9±0.78                                               |
